# Supplementary material for: Amphiphilic nanocarrier-induced modulation of PLK1 and miR-34a leads to improved therapeutic response in pancreatic cancer
Source: PubMed Central journal article supplement (PMC5750234; doi:10.1038/s41467-017-02283-9), 2018-01-02
Supplement: 41467_2017_2283_MOESM3_ESM.pdf [file 41467_2017_2283_MOESM3_ESM.pdf]

## **Description of Additional Supplementary Files**

File Name: Supplementary Movie 1

Description: Nano-polyplexes internalize into PDAC cells via endo-lysosomal pathway.

File Name: Supplementary Movie 2

Description: MiaPaCa2 cell Migration 48 h following incubation with combination treatment.
